# Supplementary material for: Light Alcohol Consumption Promotes Early Neurogenesis Following Ischemic Stroke in Adult C57BL/6J Mice
Source: MDPI journal article supplement (doi:10.3390/biomedicines11041074), 2023-04-02
Supplement: s1 [file s1]

## Supplemental Figures

Figure S1

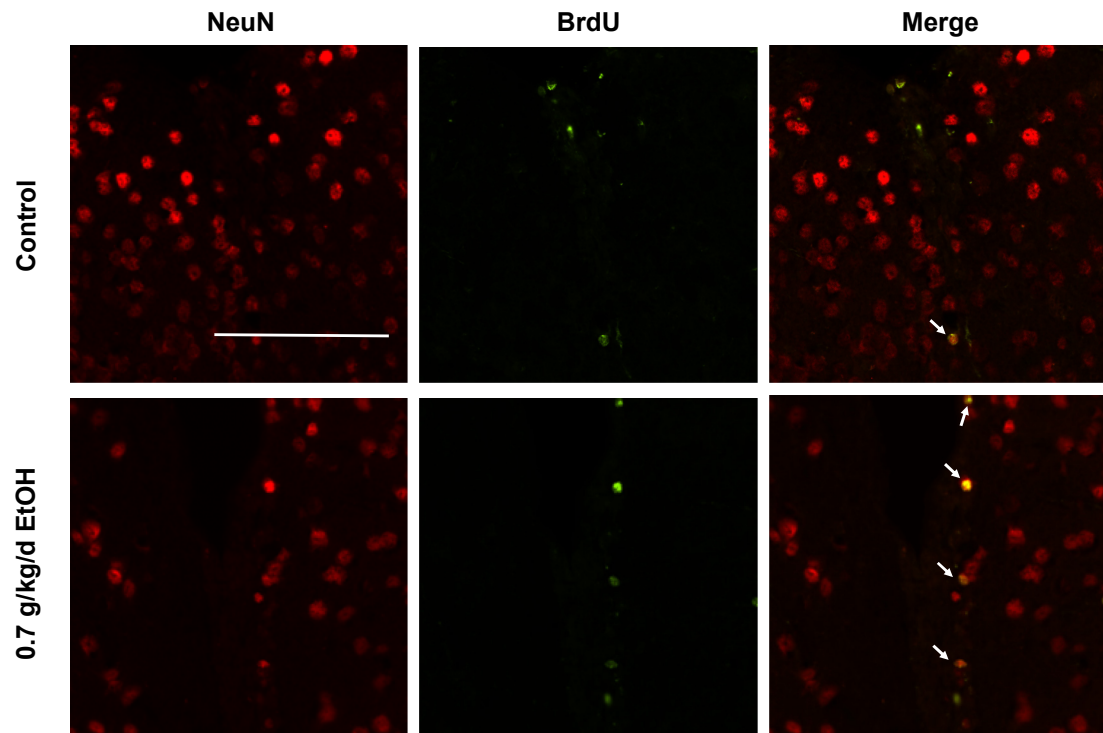

Figure S1. Effect of LAC on baseline neurogenesis in the SVZ. Representative double staining of BrdU and NeuN at 60x magnification. Scale bar = 100  $\mu$ m.

Figure S2

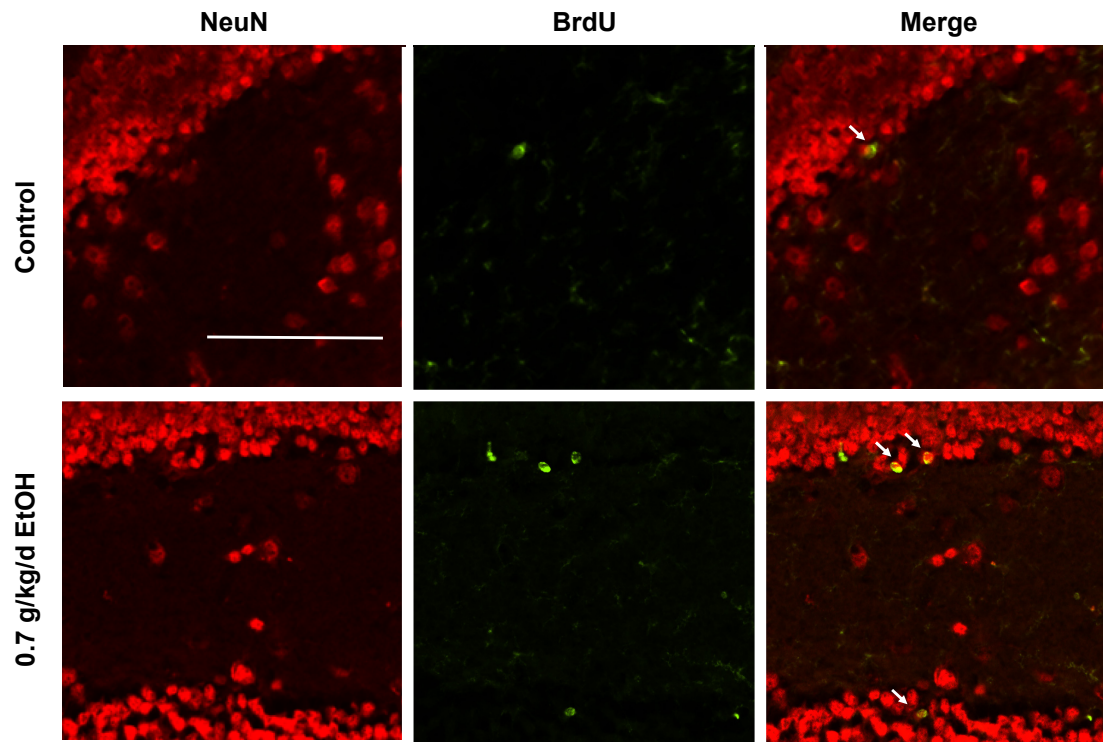

Figure S2. Effect of LAC on baseline neurogenesis in the DG. Representative double staining of BrdU and NeuN at 60x magnification. Scale bar = 100  $\mu$ m.

Figure S3

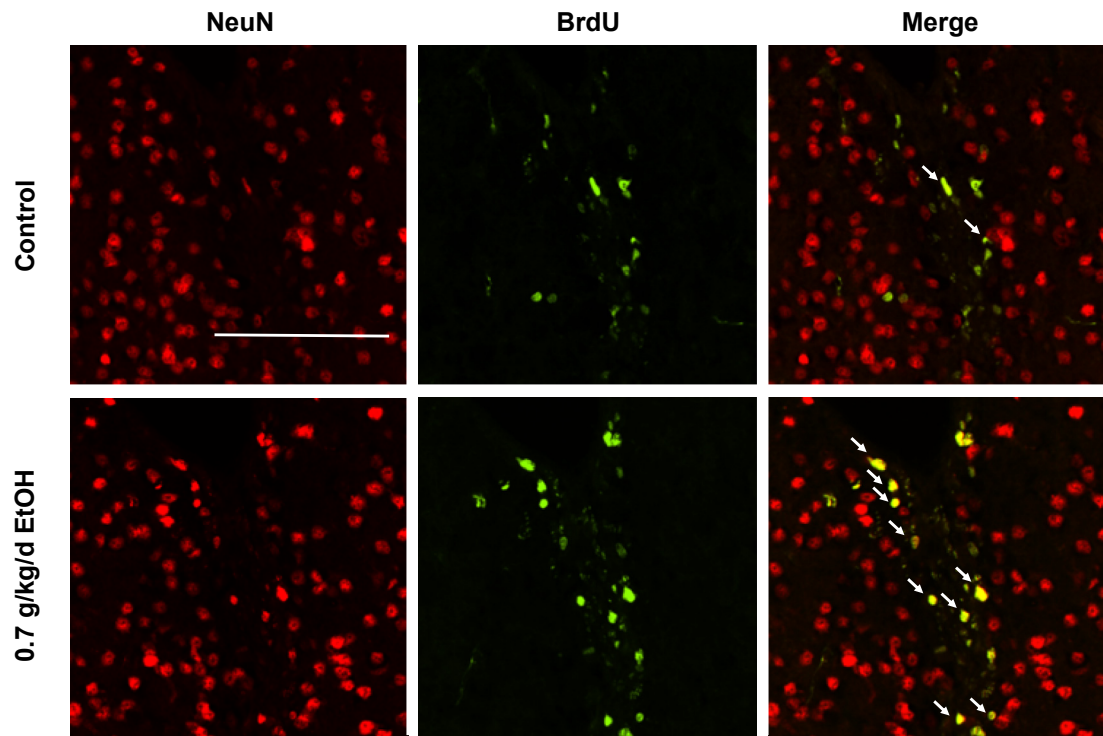

Figure S3. Effect of LAC on post-ischemic neurogenesis in the SVZ. Representative double staining of BrdU and NeuN at 60x magnification. Scale bar = 100  $\mu$ m.

Figure S4

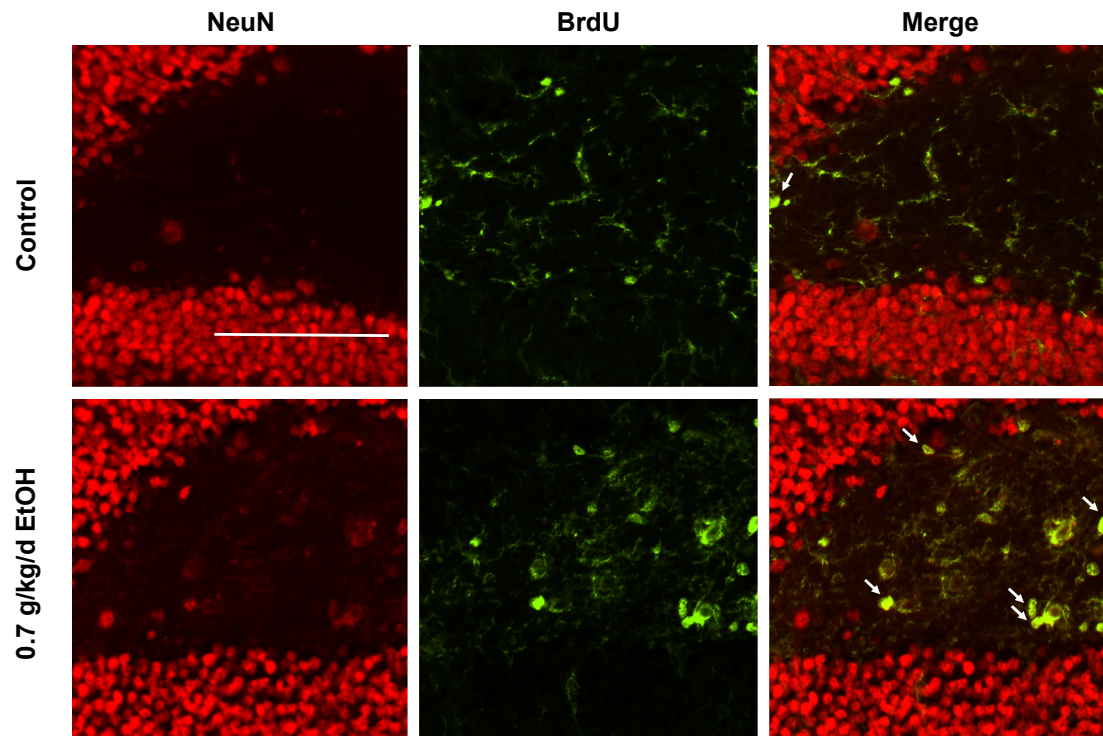

Figure S4. Effect of LAC on post-ischemic neurogenesis in the DG. Representative double staining of BrdU and NeuN at 60x magnification. Scale bar = 100  $\mu$ m.
